# Supplementary material for: Vraag het je Grote Broers
Source: Springer Nature journal article supplement (doi:10.1007/s12508-023-00419-5), 2023-11-13
Supplement: MOESM1 [file 26300186]

**Vraag het je Grote Broers**

Een verkennend kwalitatief onderzoek naar de ervaren effecten van een wijkgericht youth empowerment programma voor en door jongeren.

**Tabel 3.**

**Wat waren voor jou de ervaren effecten van de interventie Grote Broer?**

| **(Sub)thema’s** | **Effecten** | **+/- pos/ neg**  **X geen effect** |
| --- | --- | --- |
| **Levensdomein: Sociale contacten** |  |  |
|  | **Geleerd samen te werken** | **+** |
|  | **Geleerd om te gaan met kleine kinderen, leeftijdsgenoten, ouders** | **+** |
|  | **Kinderen/buurtbewoners/politie herkennen en groeten je** | **+** |
|  | **Groei in sociale ontwikkeling; ik laat mensen meer in hun waarde** | **+** |
|  | **Veel nieuwe mensen leren kennen** | **+** |
| ***Subthema: Zijn je sociale contacten veranderd sinds je meedoet aan het programma?*** |  |  |
|  | **Onderlinge band/ vriendschap met mede grote broers opgebouwd** | **+** |
|  | **Netwerk in de buurt opgebouwd** | **+** |
|  | **Weinig invloed op contact met eigen familie of vriendengroep** | **x** |
| ***Subthema: hoe voel jij je in de groep?*** |  |  |
|  | **Voelde/voelt zich welkom in groep** | **+** |
|  | **Binnen groep op je gemak zijn** | **+** |
|  | **Iedereen mag mij binnen de groep** | **+** |
|  | **Groep begeleid je, evalueert met je wat je hebt gedaan** | **+** |
|  | **Groep kent je, begrijpt je, houdt rekening met je** | **+** |
|  | **Groep Grote Broers is belangrijk voor me** | **+** |
|  | **Groep voelt als familie** | **+** |
|  | **Geleerd van de groep om meningsverschillen met respect op te lossen** | **+** |
|  | **Iedereen helpt elkaar binnen de groep** | **+** |
| ***Subthema: Wat betekenen de competentieniveaus voor jou?*** |  |  |
|  | **Niveaus geven houvast/duidelijkheid** | **+** |
|  | **Niveaus geven discipline** | **+** |
|  | **Niveaus geven je steeds meer verantwoordelijkheid** | **+ en -** |
|  | **Niveaus motiveren (andere) jongeren** | **+** |
|  | **Ik hecht veel waarde aan competentieniveaus** | **+** |
|  | **Ik vind competentieniveaus voor mij zelf niet zo belangrijk** | **x** |
| ***Subthema: Werkte een rolmodel voor jou?*** |  |  |
| ***Subthema: Ben jij voor anderen een rolmodel?*** |  |  |
|  | **Lastig te zeggen over mezelf, dat moet u de ander vragen** | **x** |
|  | **Ja ik ben voor anderen een rolmodel** | **+** |
| **Levensdomein: Dag- en vrijetijdsbesteding** |  |  |
|  | **Ik ben graag in de muziekstudio van Grote Broer** | **+** |
|  | **Minder vrije tijd** | **+ en -** |
| ***Subthema: Heeft het programma effect gehad op jouw zelfverzorging/ huishouden?*** |  |  |
|  | **Ik heb leren dweilen, koken, op te ruimen** | **+** |
| **Levensdomein: Opleiding/beroep/werk** |  |  |
|  | **Dankzij (werkers van)) het programma kwam ik op mijn opleiding/ stage** | **+** |
|  | **Ik kon het programma koppelen aan mijn beroepsproducten/ stage(opdrachten)** | **+** |
| ***Subthema: Hoe word je begeleid binnen het programma?*** |  |  |
|  | **Ik word goed begeleid tijdens het programma** | **+** |
|  | **Ik kan altijd appen, bellen, langskomen en broers/werkers helpen je** | **+** |
|  | **Wekelijks/ vaste momenten voor coaching wanneer nodig** | **+** |
|  | **Je krijgt geen standaardcursus maar leert in de praktijk van elkaar** | **+** |
| **Levensdomein: Economische zelfstandigheid/ financiële situatie** |  |  |
|  | **Geen effect op financiële situatie** | **x** |
| **Levensdomein: Gezondheid** |  |  |
|  | **Positief effect op beweging (en vitamine d) tijdens het sporten en wijkrondes** | **+** |
|  | **Ik eet beter en gezonder en draag dit met name uit bij doelgroep** | **+** |
|  | **Blowen en drank strikt verboden** | **+** |
|  | **Weinig invloed op gezondheid, roken, drinkgedrag, slapen** | **x** |
| **Levensdomein: Woon-en leefomgeving** |  |  |
|  | **Vuilnis in de wijk wordt opgeruimd** | **+** |
|  | **Ik ken door het programma nog meer mensen in de buurt, dit draagt bij aan goed gevoel in de wijk** | **+** |
|  | **Geen verandering in gevoel van veiligheid woon- of leefomgeving** | **x** |
| **Levensdomein: Zingeving, burgerschap en persoonlijke leefstijl** |  |  |
|  | **Met respect behandeld worden binnen het programma** | **+** |
|  | **Verantwoordelijkheden leren nemen en krijgen** | **+** |
|  | **Dingen voor anderen doen; dat doet je goed** | **+** |
|  | **Voor de toekomst van jongeren kunnen zorgen; dat doet je goed** | **+** |
|  | **Fijn om iets te betekenen voor en te leren van anderen** | **+** |
|  | **Ik laat me minder leiden door mijn emoties** | **+** |
|  | **Als voorbeeld voor de kinderen in de wijk gedraag je je netter** | **+** |
|  | **Geleerd hoe ik vertrouwen win om iemand te helpen ontwikkelen** | **+** |
| ***Subthema: Heb je het gevoel dat het programma je sterker maakt?*** |  |  |
|  | **Ik ben opener geworden in sociaal contact** | **+** |
|  | **Ik durf nu voor een groep te spreken** | **+** |
|  | **Ik heb veel praktijkervaring opgedaan voor later** | **+** |
| ***Subthema: Heb jij het idee dat je zelf veranderd bent binnen het programma?*** |  |  |
|  | **Ja, ik ben socialer geworden** | **+** |
|  | **Ja, ik heb meer geduld met anderen** | **+** |
|  | **Ja, ik ben minder snel boos of agressief** | **+** |
| ***Subthema: Kun je binnen het programma je eigen keuzes maken?*** |  |  |
|  | **Ja, ik kan eigen activiteiten opzetten en keuzes maken** | **+** |
| ***Subthema: Maak je buiten het programma andere keuzes nu je meedoet aan dit programma?*** |  |  |
|  | **Ja, ik wil buiten stage om het goede voorbeeld geven** | **+** |
| ***Subthema: Kijken mensen op een andere manier naar jou sinds je meedoet aan dit programma?*** |  |  |
|  | **Ja, er wordt positiever/serieuzer naar me gekeken** | **+** |
|  | **Vrienden en bekenden zijn trots op mij dat ik mee doe en het volhoud** | **+** |
| ***Subthema: Heeft het programma effect gehad op jouw vertrouwen in de toekomst?*** |  |  |
|  | **Ik heb connecties gemaakt met veel instanties waarop ik later misschien terug kan vallen** | **+** |
| ***Subthema: Heeft het programma effect op jouw deelname aan de maatschappij?*** |  |  |
|  | **Je bent actief bezig voor de maatschappij/ de wijk** | **+** |
|  | **Kinderen leren veel van het programma en van mij** | **+** |
|  | **Het voelt zinvol om kinderen van straat en relschoppen te houden** | **+** |
| ***Subthema: Kon/kun je je doelen tijdens dit programma behalen?*** |  |  |
|  | **Doel: Terug naar school (behaald of bezig te behalen)** | **+** |
|  | **Doel: Met jongeren werken (behaald of bezig te behalen)** | **+** |
|  | **Doel: Jezelf ontwikkelen anderen ontwikkelen (behaald of bezig te behalen)** | **+** |
